# Supplementary material for: Association between Alcohol Consumption and Survival in Colorectal Cancer: A Meta-analysis
Source: Oxford University Press journal article supplement (doi:10.1158/1055-9965.epi-19-0156), 2019-08-09
Supplement: 10559965epi190156-sup-216877_4_supp_5660599_pv1dw3.docx [file 10559965epi190156-sup-216877_4_supp_5660599_pv1dw3.docx]

**Supplementary Table 1**. Dose-response analysis of pre-diagnostic alcohol consumption and mortality.

|  | ***P* for non-linearity** | ***P* for linearity** |
| --- | --- | --- |
| All-cause mortality | 0.0025 | 0.79 |
| Colorectal cancer-specific mortality | 0.12 | 0.81 |

**Supplementary Table 2**. Summary of pooled relative risks (RR) for post-diagnostic alcohol consumption and mortality

|  | **Light vs. none** | | | **Moderate vs. none** | | |
| --- | --- | --- | --- | --- | --- | --- |
|  | **No. of studies** | **RR** | **95% CI** | **No. of studies** | **RR** | **95% CI** |
| All-cause mortality | 2 | 0.99 | 0.68-1.42 | 3 | 0.98 | 0.79-1.22 |
| Colorectal cancer-specific mortality | 2 | 0.95 | 0.28-3.30 | 2 | 0.85 | 0.36-2.00 |
